# Supplementary material
Source: PubMed Central journal article supplement (PMC10584055)
Supplement: sj-pdf-1-hth-10.1177_1758998320966018.pdf [file sj-pdf-1-hth-10.1177_1758998320966018.pdf]

## Supplementary Table S1-S20.

### Supplementary Table S1

Item 1. Pain on load (0 representing no problem and 100 worst problem imaginable). Number of responded questionnaires<sup>1</sup>, percentage of missing item-response of total sample<sup>2</sup>, floor (score<5) and ceiling (score>95) effect<sup>3-4</sup> and Spearman's rank correlation coefficient<sup>5</sup> between pain on load and total QuickDASH score. All at pre, 3 and 12 months follow-up for total group and in a selection of subgroups of hand related diagnoses.

| Diagnosis                   | Preoperative follow up |                |                 |                  |                       |                                   | 3-month follow up     |                |                 |                  |                       |                                   | 12-month follow up    |                |                 |                  |                       |                                   |
|-----------------------------|------------------------|----------------|-----------------|------------------|-----------------------|-----------------------------------|-----------------------|----------------|-----------------|------------------|-----------------------|-----------------------------------|-----------------------|----------------|-----------------|------------------|-----------------------|-----------------------------------|
|                             |                        |                | % of scores     |                  | Correlation QuickDASH |                                   |                       |                | % of scores     |                  | Correlation QuickDASH |                                   |                       |                | % of scores     |                  | Correlation QuickDASH |                                   |
|                             | <i>n</i> <sup>1</sup>  | % <sup>2</sup> | <5 <sup>3</sup> | >95 <sup>4</sup> | <i>n</i> <sup>1</sup> | <i>r<sub>s</sub></i> <sup>5</sup> | <i>n</i> <sup>1</sup> | % <sup>2</sup> | <5 <sup>3</sup> | >95 <sup>4</sup> | <i>n</i> <sup>1</sup> | <i>r<sub>s</sub></i> <sup>5</sup> | <i>n</i> <sup>1</sup> | % <sup>2</sup> | <5 <sup>3</sup> | >95 <sup>4</sup> | <i>n</i> <sup>1</sup> | <i>r<sub>s</sub></i> <sup>5</sup> |
| Total group                 | 12953                  | 1.8            | 21.0            | 5.0              | 12760                 | 0.69                              | 10468                 | 2.2            | 22.5            | 1.3              | 10151                 | 0.76                              | 9798                  | 1.9            | 34.4            | 1.2              | 9468                  | 0.74                              |
| Thumb osteoarthritis        | 616                    | 0.6            | 0.2             | 10.2             | 603                   | 0.43                              | 513                   | 2.1            | 3.7             | 1.4              | 495                   | 0.72                              | 500                   | 1.8            | 18.2            | 0.8              | 486                   | 0.76                              |
| Dupuytren's contracture     | 1152                   | 2.3            | 35.1            | 0.8              | 1131                  | 0.54                              | 817                   | 3.7            | 46.1            | 0.5              | 783                   | 0.66                              | 851                   | 3.6            | 54.4            | 0.2              | 814                   | 0.65                              |
| De Quervain                 | 242                    | 1.2            | 0.4             | 13.2             | 237                   | 0.57                              | 191                   | 0.5            | 24.6            | 1.0              | 180                   | 0.84                              | 152                   | 1.3            | 32.9            | 1.3              | 147                   | 0.81                              |
| Ganglion                    | 653                    | 0.6            | 12.1            | 2.1              | 648                   | 0.67                              | 440                   | 0.9            | 34.5            | 0.7              | 429                   | 0.75                              | 412                   | 1.0            | 44.4            | 0.7              | 402                   | 0.73                              |
| Trigger finger              | 954                    | 2.0            | 5.5             | 4.2              | 931                   | 0.60                              | 896                   | 2.6            | 31.8            | 1.3              | 868                   | 0.72                              | 809                   | 2.5            | 53.9            | 1.2              | 789                   | 0.67                              |
| Carpal tunnel syndrome      | 2062                   | 2.5            | 12.3            | 4.0              | 2021                  | 0.65                              | 1733                  | 2.2            | 16.1            | 1.3              | 1681                  | 0.71                              | 1442                  | 2.0            | 34.7            | 1.9              | 1376                  | 0.72                              |
| Ulnar nerve entrapment      | 368                    | 3.7            | 15.8            | 6.0              | 363                   | 0.66                              | 267                   | 1.8            | 22.1            | 2.6              | 259                   | 0.80                              | 237                   | 3.3            | 23.2            | 3.4              | 228                   | 0.75                              |
| Digital nerve injuries      | 456                    | 2.8            | 57.9            | 3.1              | 451                   | 0.73                              | 377                   | 1.3            | 17.2            | 0.8              | 365                   | 0.66                              | 392                   | 1.5            | 23.7            | 0.3              | 382                   | 0.70                              |
| Extensor tendon lacerations | 309                    | 0.3            | 40.1            | 4.5              | 307                   | 0.75                              | 230                   | 3.4            | 19.1            | 0.4              | 230                   | 0.73                              | 240                   | 2.0            | 34.6            | 1.7              | 235                   | 0.78                              |
| Flexor tendon lacerations   | 408                    | 1.2            | 51.2            | 6.4              | 403                   | 0.78                              | 365                   | 2.4            | 14.2            | 1.9              | 352                   | 0.67                              | 353                   | 3.0            | 24.4            | 1.4              | 338                   | 0.73                              |
| Thumb ligament injury       | 252                    | 2.7            | 23.8            | 7.1              | 247                   | 0.65                              | 190                   | 1.6            | 10.0            | 0.0              | 184                   | 0.71                              | 206                   | 1.0            | 30.1            | 1.5              | 201                   | 0.75                              |
| Finger fractures            | 981                    | 2.3            | 42.7            | 6.7              | 967                   | 0.71                              | 776                   | 1.3            | 12.4            | 1.0              | 760                   | 0.71                              | 771                   | 1.0            | 25.2            | 0.6              | 748                   | 0.77                              |

## Supplementary Table S2.

Item 2. Pain on motion without load (0 representing no problem and 100 worst problem imaginable). Number of responded questionnaires<sup>1</sup>, percentage of missing item response of total sample<sup>2</sup>, floor (score<5) and ceiling (score>95) effect<sup>3-4</sup> and Spearman's rank correlation coefficient<sup>5</sup> between pain on motion without load and total QuickDASH score. All at pre, 3 and 12 months follow-up for total group and in a selection of subgroups of hand related diagnoses.

| Diagnosis                   | Preoperative follow up |                |                 |                  |                       |                                   | 3-month follow up     |                |                 |                  |                       |                                   | 12-month follow up    |                |                 |                  |                       |                                   |
|-----------------------------|------------------------|----------------|-----------------|------------------|-----------------------|-----------------------------------|-----------------------|----------------|-----------------|------------------|-----------------------|-----------------------------------|-----------------------|----------------|-----------------|------------------|-----------------------|-----------------------------------|
|                             |                        |                | % of scores     |                  | Correlation QuickDASH |                                   |                       |                | % of scores     |                  | Correlation QuickDASH |                                   |                       |                | % of scores     |                  | Correlation QuickDASH |                                   |
|                             | <i>n</i> <sup>1</sup>  | % <sup>2</sup> | <5 <sup>3</sup> | >95 <sup>4</sup> | <i>n</i> <sup>1</sup> | <i>r<sub>s</sub></i> <sup>5</sup> | <i>n</i> <sup>1</sup> | % <sup>2</sup> | <5 <sup>3</sup> | >95 <sup>4</sup> | <i>n</i> <sup>1</sup> | <i>r<sub>s</sub></i> <sup>5</sup> | <i>n</i> <sup>1</sup> | % <sup>2</sup> | <5 <sup>3</sup> | >95 <sup>4</sup> | <i>n</i> <sup>1</sup> | <i>r<sub>s</sub></i> <sup>5</sup> |
| Total group                 | 12962                  | 1.8            | 30.5            | 1.2              | 12768                 | 0.68                              | 10521                 | 1.7            | 42.2            | 0.4              | 10201                 | 0.67                              | 9835                  | 1.5            | 52.7            | 0.4              | 9506                  | 0.65                              |
| Thumb osteoarthritis        | 615                    | 0.8            | 1.6             | 2.4              | 602                   | 0.46                              | 518                   | 1.1            | 24.5            | 0.2              | 499                   | 0.69                              | 504                   | 1.0            | 46.2            | 0.6              | 490                   | 0.63                              |
| Dupuytren's contracture     | 1154                   | 2.1            | 56.2            | 0.1              | 1133                  | 0.50                              | 820                   | 3.3            | 60.2            | 0.4              | 785                   | 0.50                              | 853                   | 3.4            | 66.2            | 0.1              | 817                   | 0.53                              |
| De Quervain                 | 242                    | 1.2            | 5.0             | 4.5              | 238                   | 0.47                              | 191                   | 0.5            | 40.8            | 0.0              | 181                   | 0.78                              | 153                   | 0.6            | 53.6            | 1.3              | 148                   | 0.74                              |
| Ganglion                    | 650                    | 1.1            | 29.1            | 0.2              | 645                   | 0.65                              | 440                   | 0.9            | 56.4            | 0.2              | 429                   | 0.61                              | 412                   | 1.0            | 62.1            | 0.5              | 402                   | 0.63                              |
| Trigger finger              | 956                    | 1.7            | 12.6            | 1.5              | 932                   | 0.53                              | 903                   | 1.8            | 47.1            | 0.7              | 874                   | 0.64                              | 815                   | 1.8            | 66.0            | 0.2              | 795                   | 0.55                              |
| Carpal tunnel syndrome      | 2063                   | 2.4            | 18.2            | 1.0              | 2022                  | 0.63                              | 1739                  | 1.9            | 42.4            | 0.5              | 1687                  | 0.68                              | 1451                  | 1.4            | 54.5            | 0.6              | 1386                  | 0.67                              |
| Ulnar nerve entrapment      | 369                    | 3.4            | 23.0            | 0.8              | 363                   | 0.69                              | 266                   | 2.2            | 35.0            | 1.1              | 258                   | 0.75                              | 237                   | 3.3            | 37.1            | 0.8              | 228                   | 0.72                              |
| Digital nerve injuries      | 460                    | 1.9            | 63.0            | 0.4              | 455                   | 0.66                              | 376                   | 1.6            | 40.2            | 0.3              | 364                   | 0.62                              | 393                   | 1.3            | 47.8            | 0.5              | 383                   | 0.65                              |
| Extensor tendon lacerations | 308                    | 0.6            | 49.0            | 1.3              | 306                   | 0.70                              | 232                   | 2.5            | 43.5            | 0.4              | 232                   | 0.62                              | 240                   | 2.0            | 51.3            | 0.4              | 235                   | 0.69                              |
| Flexor tendon lacerations   | 409                    | 1.0            | 57.7            | 1.7              | 404                   | 0.71                              | 367                   | 1.9            | 36.2            | 0.5              | 353                   | 0.61                              | 354                   | 2.7            | 46.0            | 0.0              | 339                   | 0.62                              |
| Thumb ligament injury       | 252                    | 2.7            | 30.2            | 0.4              | 247                   | 0.66                              | 192                   | 0.5            | 30.2            | 0.5              | 186                   | 0.63                              | 206                   | 1.0            | 44.2            | 0.0              | 201                   | 0.65                              |
| Finger fractures            | 987                    | 1.7            | 47.5            | 1.8              | 973                   | 0.69                              | 777                   | 1.1            | 35.8            | 0.3              | 761                   | 0.64                              | 772                   | 0.9            | 47.9            | 0.3              | 748                   | 0.66                              |

### Supplementary Table S3.

Item 3. Pain at rest (0 representing no problem and 100 worst problem imaginable). Number of responded questionnaires<sup>1</sup>, percentage of missing item-response of total sample<sup>2</sup>, floor (score<5) and ceiling (score>95) effect<sup>3-4</sup> and Spearman's rank correlation coefficient<sup>5</sup> between pain at rest and total QuickDASH score. All at pre, 3 and 12 months follow-up for total group and in a selection of subgroups of hand related diagnoses.

| Diagnosis                   | Preoperative follow up |                |                 |                  |                       |                                   | 3-month follow up     |                |                 |                  |                       |                                   | 12-month follow up    |                |                 |                  |                       |                                   |
|-----------------------------|------------------------|----------------|-----------------|------------------|-----------------------|-----------------------------------|-----------------------|----------------|-----------------|------------------|-----------------------|-----------------------------------|-----------------------|----------------|-----------------|------------------|-----------------------|-----------------------------------|
|                             |                        |                | % of scores     |                  | Correlation QuickDASH |                                   |                       |                | % of scores     |                  | Correlation QuickDASH |                                   |                       |                | % of scores     |                  | Correlation QuickDASH |                                   |
|                             | <i>n</i> <sup>1</sup>  | % <sup>2</sup> | <5 <sup>3</sup> | >95 <sup>4</sup> | <i>n</i> <sup>1</sup> | <i>r<sub>s</sub></i> <sup>5</sup> | <i>n</i> <sup>1</sup> | % <sup>2</sup> | <5 <sup>3</sup> | >95 <sup>4</sup> | <i>n</i> <sup>1</sup> | <i>r<sub>s</sub></i> <sup>5</sup> | <i>n</i> <sup>1</sup> | % <sup>2</sup> | <5 <sup>3</sup> | >95 <sup>4</sup> | <i>n</i> <sup>1</sup> | <i>r<sub>s</sub></i> <sup>5</sup> |
| Total group                 | 12950                  | 1.9            | 37.6            | 1.1              | 12759                 | 0.65                              | 10527                 | 1.6            | 56.6            | 0.3              | 10206                 | 0.58                              | 9828                  | 1.6            | 61.8            | 0.4              | 9494                  | 0.58                              |
| Thumb osteoarthritis        | 608                    | 1.9            | 4.4             | 2.8              | 595                   | 0.47                              | 517                   | 1.3            | 37.3            | 0.2              | 498                   | 0.65                              | 504                   | 1.0            | 55.8            | 0.2              | 490                   | 0.54                              |
| Dupuytren's contracture     | 1151                   | 2.4            | 62.2            | 0.2              | 1130                  | 0.45                              | 826                   | 2.6            | 67.1            | 0.1              | 791                   | 0.40                              | 856                   | 3.1            | 72.3            | 0.0              | 820                   | 0.45                              |
| De Quervain                 | 241                    | 1.6            | 15.4            | 0.8              | 237                   | 0.48                              | 190                   | 1.0            | 56.8            | 0.0              | 181                   | 0.67                              | 153                   | 0.6            | 60.8            | 0.7              | 148                   | 0.72                              |
| Ganglion                    | 644                    | 2.0            | 42.2            | 0.6              | 639                   | 0.57                              | 436                   | 1.8            | 72.9            | 0.0              | 425                   | 0.41                              | 410                   | 1.4            | 65.6            | 0.2              | 401                   | 0.58                              |
| Trigger finger              | 955                    | 1.8            | 24.8            | 1.2              | 932                   | 0.53                              | 902                   | 2.0            | 60.0            | 0.4              | 872                   | 0.54                              | 813                   | 2.0            | 71.1            | 0.4              | 791                   | 0.47                              |
| Carpal tunnel syndrome      | 2073                   | 1.9            | 15.1            | 2.9              | 2033                  | 0.52                              | 1743                  | 1.6            | 52.2            | 0.3              | 1691                  | 0.61                              | 1446                  | 1.7            | 57.4            | 0.6              | 1381                  | 0.63                              |
| Ulnar nerve entrapment      | 369                    | 3.4            | 24.1            | 0.3              | 364                   | 0.63                              | 267                   | 1.8            | 36.3            | 1.5              | 259                   | 0.73                              | 238                   | 2.9            | 35.3            | 2.5              | 229                   | 0.70                              |
| Digital nerve injuries      | 460                    | 1.9            | 72.0            | 0.4              | 455                   | 0.57                              | 376                   | 1.6            | 63.3            | 0.3              | 365                   | 0.54                              | 392                   | 1.5            | 59.4            | 0.3              | 382                   | 0.56                              |
| Extensor tendon lacerations | 307                    | 1.0            | 62.2            | 0.3              | 305                   | 0.58                              | 232                   | 2.5            | 65.1            | 0.0              | 231                   | 0.45                              | 242                   | 1.2            | 64.0            | 0.0              | 237                   | 0.55                              |
| Flexor tendon lacerations   | 412                    | 0.2            | 67.0            | 0.2              | 408                   | 0.67                              | 364                   | 2.7            | 56.9            | 0.3              | 350                   | 0.57                              | 355                   | 2.5            | 55.5            | 0.6              | 339                   | 0.64                              |
| Thumb ligament injury       | 253                    | 2.3            | 45.4            | 0.4              | 248                   | 0.60                              | 191                   | 1.0            | 53.9            | 0.5              | 185                   | 0.52                              | 207                   | 0.5            | 66.7            | 0.0              | 202                   | 0.55                              |
| Finger fractures            | 985                    | 1.9            | 55.9            | 0.5              | 970                   | 0.65                              | 778                   | 1.0            | 58.9            | 0.1              | 762                   | 0.54                              | 772                   | 0.9            | 63.9            | 0.1              | 748                   | 0.59                              |

Supplementary Table S4.

Item 4. Stiffness (0 representing no problem and 100 worst problem imaginable). Number of responded questionnaires<sup>1</sup>, percentage of missing item-response of total sample<sup>2</sup>, floor (score<5) and ceiling (score>95) effect<sup>3,4</sup> and Spearman's rank correlation coefficient<sup>5</sup> between stiffness and total QuickDASH score. All at pre, 3 and 12 months follow-up for total group and in a selection of subgroups of hand related diagnoses.

| Diagnosis                   | Preoperative follow up |                |                 |                  |                       |                                   | 3-month follow up     |                |                 |                  |                       |                                   | 12-month follow up    |                |                 |                  |                       |                                   |
|-----------------------------|------------------------|----------------|-----------------|------------------|-----------------------|-----------------------------------|-----------------------|----------------|-----------------|------------------|-----------------------|-----------------------------------|-----------------------|----------------|-----------------|------------------|-----------------------|-----------------------------------|
|                             |                        |                | % of scores     |                  | Correlation QuickDASH |                                   |                       |                | % of scores     |                  | Correlation QuickDASH |                                   |                       |                | % of scores     |                  | Correlation QuickDASH |                                   |
|                             | <i>n</i> <sup>1</sup>  | % <sup>2</sup> | <5 <sup>3</sup> | >95 <sup>4</sup> | <i>n</i> <sup>1</sup> | <i>r<sub>s</sub></i> <sup>5</sup> | <i>n</i> <sup>1</sup> | % <sup>2</sup> | <5 <sup>3</sup> | >95 <sup>4</sup> | <i>n</i> <sup>1</sup> | <i>r<sub>s</sub></i> <sup>5</sup> | <i>n</i> <sup>1</sup> | % <sup>2</sup> | <5 <sup>3</sup> | >95 <sup>4</sup> | <i>n</i> <sup>1</sup> | <i>r<sub>s</sub></i> <sup>5</sup> |
| Total group (n=13197)       | 12869                  | 2.5            | 27.2            | 4.1              | 12678                 | 0.50                              | 10528                 | 1.6            | 24.0            | 1.8              | 10207                 | 0.58                              | 9828                  | 1.6            | 34.0            | 2.0              | 9496                  | 0.58                              |
| Thumb osteoarthritis        | 604                    | 2.6            | 15.6            | 1.7              | 591                   | 0.35                              | 516                   | 1.5            | 16.7            | 0.8              | 497                   | 0.56                              | 506                   | 0.6            | 37.0            | 0.6              | 492                   | 0.51                              |
| Dupuytren's contracture     | 1148                   | 2.6            | 9.7             | 9.8              | 1127                  | 0.33                              | 823                   | 2.9            | 26.7            | 1.6              | 788                   | 0.60                              | 856                   | 3.1            | 35.5            | 2.0              | 819                   | 0.60                              |
| De Quervain                 | 239                    | 2.4            | 19.7            | 2.5              | 235                   | 0.41                              | 189                   | 1.6            | 38.6            | 0.5              | 179                   | 0.65                              | 154                   | 0.0            | 53.9            | 1.3              | 148                   | 0.68                              |
| Ganglion                    | 645                    | 1.8            | 40.2            | 0.2              | 640                   | 0.45                              | 438                   | 1.4            | 38.4            | 0.0              | 427                   | 0.52                              | 412                   | 1.0            | 47.1            | 0.0              | 402                   | 0.52                              |
| Trigger finger              | 950                    | 2.4            | 7.1             | 6.4              | 929                   | 0.37                              | 902                   | 2.0            | 28.0            | 1.2              | 872                   | 0.57                              | 811                   | 2.3            | 49.8            | 0.5              | 789                   | 0.54                              |
| Carpal tunnel syndrome      | 2062                   | 2.5            | 20.0            | 1.7              | 2021                  | 0.52                              | 1740                  | 1.8            | 31.7            | 0.9              | 1688                  | 0.57                              | 1449                  | 1.5            | 44.6            | 0.8              | 1385                  | 0.63                              |
| Ulnar nerve entrapment      | 369                    | 3.4            | 23.3            | 1.4              | 363                   | 0.53                              | 263                   | 3.3            | 30.0            | 1.5              | 255                   | 0.64                              | 238                   | 2.9            | 32.8            | 2.5              | 230                   | 0.60                              |
| Digital nerve injuries      | 458                    | 2.3            | 60.9            | 2.4              | 453                   | 0.70                              | 378                   | 1.0            | 18.3            | 1.6              | 366                   | 0.52                              | 393                   | 1.3            | 24.9            | 1.3              | 383                   | 0.56                              |
| Extensor tendon lacerations | 306                    | 1.3            | 42.5            | 4.9              | 304                   | 0.68                              | 231                   | 2.9            | 13.4            | 1.7              | 231                   | 0.60                              | 240                   | 2.0            | 20.4            | 2.9              | 235                   | 0.64                              |
| Flexor tendon lacerations   | 404                    | 2.2            | 51.7            | 6.9              | 399                   | 0.73                              | 368                   | 1.6            | 6.0             | 3.5              | 354                   | 0.56                              | 356                   | 2.2            | 11.0            | 3.9              | 340                   | 0.59                              |
| Thumb ligament injury       | 246                    | 5.0            | 39.0            | 2.4              | 241                   | 0.56                              | 192                   | 0.5            | 8.3             | 1.6              | 186                   | 0.56                              | 206                   | 1.0            | 23.3            | 0.5              | 201                   | 0.53                              |
| Finger fractures            | 972                    | 3.2            | 43.6            | 4.8              | 958                   | 0.67                              | 781                   | 0.6            | 10.1            | 2.9              | 765                   | 0.59                              | 772                   | 0.9            | 16.7            | 4.4              | 749                   | 0.65                              |

Supplementary Table S5.

Item 5. Weakness (0 representing no problem and 100 worst problem imaginable). Number of responded questionnaires<sup>1</sup>, percentage of missing item-response of total sample<sup>2</sup>, floor (score<5) and ceiling (score>95) effect<sup>3-4</sup> and Spearman's rank correlation coefficient<sup>5</sup> between weakness and total QuickDASH score. All at pre, 3 and 12 months follow-up for total group and in a selection of subgroups of hand related diagnoses.

| Diagnosis                   | Preoperative follow up |                |                 |                  |                       |                                   | 3-month follow up     |                |                 |                  |                       |                                   | 12-month follow up    |                |                 |                  |                       |                                   |
|-----------------------------|------------------------|----------------|-----------------|------------------|-----------------------|-----------------------------------|-----------------------|----------------|-----------------|------------------|-----------------------|-----------------------------------|-----------------------|----------------|-----------------|------------------|-----------------------|-----------------------------------|
|                             |                        |                | % of scores     |                  | Correlation QuickDASH |                                   |                       |                | % of scores     |                  | Correlation QuickDASH |                                   |                       |                | % of scores     |                  | Correlation QuickDASH |                                   |
|                             | <i>n</i> <sup>1</sup>  | % <sup>2</sup> | <5 <sup>3</sup> | >95 <sup>4</sup> | <i>n</i> <sup>1</sup> | <i>r<sub>s</sub></i> <sup>5</sup> | <i>n</i> <sup>1</sup> | % <sup>2</sup> | <5 <sup>3</sup> | >95 <sup>4</sup> | <i>n</i> <sup>1</sup> | <i>r<sub>s</sub></i> <sup>5</sup> | <i>n</i> <sup>1</sup> | % <sup>2</sup> | <5 <sup>3</sup> | >95 <sup>4</sup> | <i>n</i> <sup>1</sup> | <i>r<sub>s</sub></i> <sup>5</sup> |
| Total group                 | 12855                  | 2.6            | 24.6            | 4.4              | 12676                 | 0.67                              | 10500                 | 1.9            | 22.9            | 1.6              | 10185                 | 0.73                              | 9807                  | 1.8            | 31.8            | 1.6              | 9478                  | 0.74                              |
| Thumb osteoarthritis        | 609                    | 1.8            | 3.0             | 6.4              | 597                   | 0.36                              | 513                   | 2.1            | 5.8             | 1.2              | 495                   | 0.63                              | 501                   | 1.6            | 13.6            | 0.8              | 487                   | 0.70                              |
| Dupuytren's contracture     | 1140                   | 3.3            | 31.4            | 1.6              | 1120                  | 0.55                              | 823                   | 2.9            | 42.8            | 0.6              | 788                   | 0.62                              | 850                   | 3.7            | 48.8            | 0.6              | 813                   | 0.66                              |
| De Quervain                 | 240                    | 2.0            | 10.0            | 5.0              | 237                   | 0.47                              | 190                   | 1.0            | 28.9            | 0.0              | 180                   | 0.78                              | 153                   | 0.6            | 35.9            | 2.0              | 148                   | 0.80                              |
| Ganglion                    | 645                    | 1.8            | 35.0            | 0.8              | 641                   | 0.63                              | 439                   | 1.1            | 43.3            | 0.0              | 428                   | 0.67                              | 411                   | 1.2            | 51.8            | 0.0              | 401                   | 0.68                              |
| Trigger finger              | 948                    | 2.6            | 12.3            | 3.4              | 925                   | 0.54                              | 901                   | 2.1            | 32.7            | 0.9              | 871                   | 0.68                              | 811                   | 2.3            | 48.3            | 0.9              | 790                   | 0.66                              |
| Carpal tunnel syndrome      | 2070                   | 2.1            | 10.2            | 3.0              | 2032                  | 0.63                              | 1735                  | 2.1            | 16.9            | 1.7              | 1682                  | 0.70                              | 1441                  | 2.0            | 31.0            | 1.8              | 1379                  | 0.71                              |
| Ulnar nerve entrapment      | 376                    | 1.6            | 9.8             | 6.6              | 371                   | 0.60                              | 267                   | 1.8            | 15.4            | 2.2              | 259                   | 0.73                              | 238                   | 2.9            | 14.3            | 3.4              | 229                   | 0.68                              |
| Digital nerve injuries      | 455                    | 3.0            | 58.2            | 2.6              | 450                   | 0.73                              | 379                   | 0.8            | 18.2            | 1.3              | 367                   | 0.67                              | 393                   | 1.3            | 25.7            | 1.0              | 383                   | 0.69                              |
| Extensor tendon lacerations | 304                    | 1.9            | 39.8            | 10.2             | 302                   | 0.75                              | 228                   | 4.2            | 12.7            | 0.9              | 228                   | 0.69                              | 240                   | 2.0            | 27.9            | 2.9              | 236                   | 0.75                              |
| Flexor tendon lacerations   | 405                    | 1.9            | 49.6            | 8.9              | 400                   | 0.74                              | 369                   | 1.3            | 7.9             | 2.7              | 355                   | 0.66                              | 356                   | 2.2            | 14.0            | 2.8              | 341                   | 0.69                              |
| Thumb ligament injury       | 245                    | 5.4            | 26.5            | 6.5              | 240                   | 0.58                              | 189                   | 2.1            | 8.5             | 2.6              | 185                   | 0.63                              | 206                   | 1.0            | 21.8            | 0.5              | 201                   | 0.76                              |
| Finger fractures            | 956                    | 4.8            | 45.4            | 7.1              | 943                   | 0.70                              | 778                   | 1.0            | 12.5            | 1.7              | 762                   | 0.72                              | 766                   | 1.7            | 25.7            | 1.4              | 742                   | 0.77                              |

## Supplementary Table S6.

Item 6. Numbness/tingling in fingers (0 representing no problem and 100 worst problem imaginable). Number of responded questionnaires<sup>1</sup>, percentage of missing item-response of total sample<sup>2</sup>, floor (score<5) and ceiling (score>95) effect<sup>3-4</sup> and Spearman's rank correlation coefficient<sup>5</sup> between numbness and total QuickDASH score. All at pre, 3 and 12 months follow-up for total group and in a selection of subgroups of hand related diagnoses.

| Diagnosis                   | Preoperative follow up |                |                 |                  |                       |                                   | 3-month follow up     |                |                 |                  |                       |                                   | 12-month follow up    |                |                 |                  |                       |                                   |
|-----------------------------|------------------------|----------------|-----------------|------------------|-----------------------|-----------------------------------|-----------------------|----------------|-----------------|------------------|-----------------------|-----------------------------------|-----------------------|----------------|-----------------|------------------|-----------------------|-----------------------------------|
|                             |                        |                | % of scores     |                  | Correlation QuickDASH |                                   |                       |                | % of scores     |                  | Correlation QuickDASH |                                   |                       |                | % of scores     |                  | Correlation QuickDASH |                                   |
|                             | <i>n</i> <sup>1</sup>  | % <sup>2</sup> | <5 <sup>3</sup> | >95 <sup>4</sup> | <i>n</i> <sup>1</sup> | <i>r<sub>s</sub></i> <sup>5</sup> | <i>n</i> <sup>1</sup> | % <sup>2</sup> | <5 <sup>3</sup> | >95 <sup>4</sup> | <i>n</i> <sup>1</sup> | <i>r<sub>s</sub></i> <sup>5</sup> | <i>n</i> <sup>1</sup> | % <sup>2</sup> | <5 <sup>3</sup> | >95 <sup>4</sup> | <i>n</i> <sup>1</sup> | <i>r<sub>s</sub></i> <sup>5</sup> |
| Total group                 | 12885                  | 2.4            | 43.3            | 3.9              | 12701                 | 0.52                              | 10492                 | 2.0            | 51.4            | 1.5              | 10174                 | 0.47                              | 9806                  | 1.8            | 52.6            | 1.6              | 9476                  | 0.54                              |
| Thumb osteoarthritis        | 593                    | 4.4            | 36.3            | 1.9              | 583                   | 0.40                              | 515                   | 1.7            | 52.6            | 0.6              | 496                   | 0.45                              | 501                   | 1.6            | 60.5            | 0.2              | 487                   | 0.43                              |
| Dupuytren's contracture     | 1150                   | 2.5            | 56.3            | 0.3              | 1130                  | 0.48                              | 818                   | 3.5            | 53.8            | 0.7              | 783                   | 0.47                              | 847                   | 4.1            | 63.4            | 0.6              | 810                   | 0.46                              |
| De Quervain                 | 238                    | 2.9            | 45.4            | 1.3              | 234                   | 0.40                              | 188                   | 2.1            | 53.2            | 1.1              | 178                   | 0.57                              | 152                   | 1.3            | 60.5            | 1.3              | 147                   | 0.64                              |
| Ganglion                    | 640                    | 2.6            | 54.8            | 0.6              | 635                   | 0.52                              | 438                   | 1.4            | 66.9            | 0.2              | 427                   | 0.36                              | 410                   | 1.4            | 66.8            | 0.0              | 400                   | 0.48                              |
| Trigger finger              | 938                    | 3.6            | 49.8            | 0.6              | 917                   | 0.46                              | 897                   | 2.5            | 64.5            | 0.4              | 866                   | 0.40                              | 810                   | 2.4            | 66.8            | 0.9              | 790                   | 0.46                              |
| Carpal tunnel syndrome      | 2094                   | 0.9            | 1.2             | 14.5             | 2052                  | 0.43                              | 1740                  | 1.8            | 48.0            | 2.5              | 1687                  | 0.55                              | 1446                  | 1.7            | 47.2            | 2.1              | 1384                  | 0.60                              |
| Ulnar nerve entrapment      | 378                    | 1.0            | 2.6             | 14.6             | 372                   | 0.41                              | 269                   | 1.1            | 14.9            | 5.2              | 261                   | 0.68                              | 240                   | 2.0            | 12.9            | 7.1              | 231                   | 0.58                              |
| Digital nerve injuries      | 461                    | 1.7            | 57.0            | 4.8              | 456                   | 0.70                              | 377                   | 1.3            | 15.6            | 5.0              | 365                   | 0.50                              | 391                   | 1.8            | 16.4            | 2.8              | 381                   | 0.56                              |
| Extensor tendon lacerations | 306                    | 1.3            | 67.0            | 2.0              | 304                   | 0.48                              | 230                   | 3.4            | 60.0            | 0.4              | 230                   | 0.39                              | 243                   | 0.8            | 57.2            | 2.5              | 238                   | 0.52                              |
| Flexor tendon lacerations   | 410                    | 0.7            | 62.4            | 1.7              | 405                   | 0.63                              | 363                   | 2.9            | 40.5            | 2.8              | 349                   | 0.57                              | 354                   | 2.7            | 35.0            | 3.4              | 338                   | 0.65                              |
| Thumb ligament injury       | 249                    | 3.9            | 66.3            | 0.0              | 244                   | 0.46                              | 191                   | 1.0            | 62.8            | 0.5              | 185                   | 0.46                              | 205                   | 1.4            | 62.4            | 1.0              | 200                   | 0.43                              |
| Finger fractures            | 979                    | 2.5            | 61.5            | 1.0              | 966                   | 0.57                              | 774                   | 1.5            | 54.8            | 0.9              | 759                   | 0.51                              | 772                   | 0.9            | 55.1            | 0.6              | 748                   | 0.59                              |

## Supplementary Table S7.

Item 7. Cold sensitivity - discomfort on exposure to cold (0 representing no problem and 100 worst problem imaginable). Number of responded questionnaires<sup>1</sup>, percentage of missing item-response of total sample<sup>2</sup>, floor (score<5) and ceiling (score>95) effect<sup>3-4</sup> and Spearman's rank correlation coefficient<sup>5</sup> between cold sensitivity and total QuickDASH score. All at pre, 3 and 12 months follow-up for total group and in a selection of subgroups of hand related diagnoses.

| Diagnosis                   | Preoperative follow up |                |                 |                  |                       |                                   | 3-month follow up     |                |                 |                  |                       |                                   | 12-month follow up    |                |                 |                  |                       |                                   |
|-----------------------------|------------------------|----------------|-----------------|------------------|-----------------------|-----------------------------------|-----------------------|----------------|-----------------|------------------|-----------------------|-----------------------------------|-----------------------|----------------|-----------------|------------------|-----------------------|-----------------------------------|
|                             |                        |                | % of scores     |                  | Correlation QuickDASH |                                   |                       |                | % of scores     |                  | Correlation QuickDASH |                                   |                       |                | % of scores     |                  | Correlation QuickDASH |                                   |
|                             | <i>n</i> <sup>1</sup>  | % <sup>2</sup> | <5 <sup>3</sup> | >95 <sup>4</sup> | <i>n</i> <sup>1</sup> | <i>r<sub>s</sub></i> <sup>5</sup> | <i>n</i> <sup>1</sup> | % <sup>2</sup> | <5 <sup>3</sup> | >95 <sup>4</sup> | <i>n</i> <sup>1</sup> | <i>r<sub>s</sub></i> <sup>5</sup> | <i>n</i> <sup>1</sup> | % <sup>2</sup> | <5 <sup>3</sup> | >95 <sup>4</sup> | <i>n</i> <sup>1</sup> | <i>r<sub>s</sub></i> <sup>5</sup> |
| Total group                 | 12384                  | 6.2            | 45.4            | 3.2              | 12208                 | 0.44                              | 9891                  | 7.6            | 48.1            | 2.7              | 9594                  | 0.46                              | 9701                  | 2.9            | 46.3            | 3.9              | 9383                  | 0.52                              |
| Thumb osteoarthritis        | 585                    | 5.6            | 30.6            | 1.9              | 573                   | 0.31                              | 472                   | 9.9            | 51.7            | 0.6              | 454                   | 0.45                              | 490                   | 3.7            | 52.4            | 1.2              | 476                   | 0.44                              |
| Dupuytren's contracture     | 1152                   | 2.3            | 44.5            | 1.5              | 1131                  | 0.39                              | 776                   | 8.5            | 52.3            | 1.5              | 742                   | 0.46                              | 844                   | 4.4            | 50.4            | 1.8              | 809                   | 0.47                              |
| De Quervain                 | 239                    | 2.4            | 52.3            | 5.0              | 235                   | 0.29                              | 180                   | 6.3            | 56.1            | 0.6              | 170                   | 0.59                              | 153                   | 0.6            | 61.4            | 1.3              | 147                   | 0.62                              |
| Ganglion                    | 632                    | 3.8            | 55.0            | 1.4              | 628                   | 0.41                              | 413                   | 7.0            | 64.9            | 0.7              | 403                   | 0.30                              | 411                   | 1.2            | 63.7            | 0.7              | 401                   | 0.43                              |
| Trigger finger              | 921                    | 5.3            | 49.4            | 2.0              | 899                   | 0.37                              | 849                   | 7.7            | 62.8            | 1.2              | 823                   | 0.42                              | 808                   | 2.7            | 66.2            | 1.6              | 787                   | 0.46                              |
| Carpal tunnel syndrome      | 1959                   | 7.3            | 20.6            | 6.7              | 1922                  | 0.43                              | 1628                  | 8.1            | 52.1            | 2.0              | 1584                  | 0.53                              | 1419                  | 3.5            | 49.8            | 3.2              | 1360                  | 0.54                              |
| Ulnar nerve entrapment      | 361                    | 5.5            | 18.8            | 8.6              | 355                   | 0.47                              | 258                   | 5.1            | 28.7            | 4.3              | 250                   | 0.66                              | 235                   | 4.1            | 29.8            | 3.8              | 226                   | 0.59                              |
| Digital nerve injuries      | 399                    | 14.9           | 70.9            | 1.8              | 396                   | 0.44                              | 352                   | 7.9            | 15.1            | 6.8              | 341                   | 0.54                              | 386                   | 3.0            | 15.8            | 6.2              | 376                   | 0.58                              |
| Extensor tendon lacerations | 286                    | 7.7            | 66.1            | 3.5              | 284                   | 0.34                              | 211                   | 11.3           | 43.1            | 1.4              | 211                   | 0.45                              | 241                   | 1.6            | 36.5            | 5.4              | 236                   | 0.53                              |
| Flexor tendon lacerations   | 373                    | 9.7            | 68.4            | 0.3              | 368                   | 0.47                              | 350                   | 6.4            | 31.4            | 4.6              | 337                   | 0.51                              | 350                   | 3.8            | 27.7            | 8.9              | 335                   | 0.53                              |
| Thumb ligament injury       | 240                    | 7.3            | 64.6            | 0.0              | 235                   | 0.30                              | 172                   | 10.9           | 50.6            | 1.7              | 166                   | 0.55                              | 202                   | 2.9            | 49.0            | 1.5              | 199                   | 0.48                              |
| Finger fractures            | 907                    | 9.7            | 65.0            | 1.3              | 895                   | 0.36                              | 732                   | 6.9            | 41.1            | 3.0              | 717                   | 0.52                              | 762                   | 2.2            | 38.1            | 5.6              | 740                   | 0.58                              |

Supplementary Table S8.

Item 8. Ability to perform daily activities (0 representing no problem and 100 worst problem imaginable). Number of responded questionnaires<sup>1</sup>, percentage of missing item-response of total sample<sup>2</sup>, floor (score<5) and ceiling (score>95) effect<sup>3-4</sup> and Spearman's rank correlation coefficient<sup>5</sup> between ability to perform daily activities and total QuickDASH score. All at pre, 3 and 12 months follow-up for total group and in a selection of subgroups of hand related diagnoses.

| Diagnosis                   | Preoperative follow up |                |                 |                  |                       |                                   | 3-month follow up     |                |                 |                  |                       |                                   | 12-month follow up    |                |                 |                  |                       |                                   |
|-----------------------------|------------------------|----------------|-----------------|------------------|-----------------------|-----------------------------------|-----------------------|----------------|-----------------|------------------|-----------------------|-----------------------------------|-----------------------|----------------|-----------------|------------------|-----------------------|-----------------------------------|
|                             |                        |                | % of scores     |                  | Correlation QuickDASH |                                   |                       |                | % of scores     |                  | Correlation QuickDASH |                                   |                       |                | % of scores     |                  | Correlation QuickDASH |                                   |
|                             | <i>n</i> <sup>1</sup>  | % <sup>2</sup> | <5 <sup>3</sup> | >95 <sup>4</sup> | <i>n</i> <sup>1</sup> | <i>r<sub>s</sub></i> <sup>5</sup> | <i>n</i> <sup>1</sup> | % <sup>2</sup> | <5 <sup>3</sup> | >95 <sup>4</sup> | <i>n</i> <sup>1</sup> | <i>r<sub>s</sub></i> <sup>5</sup> | <i>n</i> <sup>1</sup> | % <sup>2</sup> | <5 <sup>3</sup> | >95 <sup>4</sup> | <i>n</i> <sup>1</sup> | <i>r<sub>s</sub></i> <sup>5</sup> |
| Total group                 | 12991                  | 1.6            | 18.9            | 4.6              | 12805                 | 0.72                              | 10495                 | 1.9            | 32.9            | 1.2              | 10180                 | 0.79                              | 9816                  | 1.7            | 43.0            | 1.2              | 9487                  | 0.76                              |
| Thumb osteoarthritis        | 613                    | 1.1            | 2.1             | 5.7              | 600                   | 0.53                              | 514                   | 1.9            | 12.3            | 0.6              | 495                   | 0.77                              | 501                   | 1.6            | 31.9            | 0.8              | 487                   | 0.75                              |
| Dupuytren's contracture     | 1156                   | 2.0            | 13.1            | 2.1              | 1134                  | 0.56                              | 817                   | 3.7            | 51.0            | 0.5              | 783                   | 0.65                              | 854                   | 3.3            | 55.7            | 0.2              | 817                   | 0.64                              |
| De Quervain                 | 242                    | 1.2            | 2.5             | 9.1              | 238                   | 0.66                              | 190                   | 1.0            | 35.8            | 1.6              | 180                   | 0.83                              | 152                   | 1.3            | 52.0            | 2.0              | 147                   | 0.83                              |
| Ganglion                    | 651                    | 0.9            | 20.6            | 1.8              | 647                   | 0.72                              | 436                   | 1.8            | 52.3            | 0.5              | 425                   | 0.70                              | 412                   | 1.0            | 57.3            | 0.5              | 402                   | 0.71                              |
| Trigger finger              | 956                    | 1.7            | 7.6             | 3.9              | 933                   | 0.64                              | 901                   | 2.1            | 43.1            | 1.1              | 872                   | 0.72                              | 812                   | 2.2            | 60.8            | 0.6              | 792                   | 0.62                              |
| Carpal tunnel syndrome      | 2077                   | 1.8            | 8.3             | 3.5              | 2038                  | 0.68                              | 1740                  | 1.8            | 31.1            | 1.0              | 1687                  | 0.77                              | 1444                  | 1.8            | 46.2            | 1.7              | 1381                  | 0.76                              |
| Ulnar nerve entrapment      | 380                    | 0.5            | 11.1            | 6.6              | 374                   | 0.70                              | 268                   | 1.5            | 24.3            | 1.9              | 260                   | 0.85                              | 240                   | 2.0            | 24.2            | 3.3              | 231                   | 0.80                              |
| Digital nerve injuries      | 457                    | 2.6            | 56.9            | 3.3              | 453                   | 0.76                              | 379                   | 0.8            | 30.6            | 1.1              | 367                   | 0.74                              | 390                   | 2.0            | 30.5            | 0.0              | 380                   | 0.76                              |
| Extensor tendon lacerations | 306                    | 1.3            | 37.3            | 7.8              | 304                   | 0.78                              | 230                   | 3.4            | 36.5            | 0.4              | 230                   | 0.69                              | 243                   | 0.8            | 44.9            | 0.8              | 238                   | 0.77                              |
| Flexor tendon lacerations   | 408                    | 1.2            | 48.5            | 7.1              | 404                   | 0.80                              | 366                   | 2.1            | 19.4            | 1.9              | 352                   | 0.77                              | 354                   | 2.7            | 26.6            | 1.7              | 338                   | 0.79                              |
| Thumb ligament injury       | 253                    | 2.3            | 22.9            | 4.3              | 248                   | 0.71                              | 191                   | 1.0            | 20.4            | 1.0              | 186                   | 0.80                              | 204                   | 1.9            | 37.7            | 0.5              | 199                   | 0.75                              |
| Finger fractures            | 982                    | 2.2            | 42.0            | 8.2              | 968                   | 0.77                              | 776                   | 1.3            | 28.5            | 0.8              | 761                   | 0.80                              | 772                   | 0.9            | 41.8            | 0.9              | 748                   | 0.80                              |



## Supplementary Table S9

Effect size calculations for the HQ-8 questionnaire in the subgroup thumb osteoarthritis. Number of responses <sup>1</sup>. The mean paired change between pre- and 3 months follow-up as well as pre- and 12 months follow-up was divided by the dispersion measure (SD) of the preoperative (baseline) scores.

|   | Thumb osteoarthritis                | Baseline-preoperative/<br>3- month follow-up |                |       |                | Baseline-preoperative/<br>12- month follow-up |                |       |                |
|---|-------------------------------------|----------------------------------------------|----------------|-------|----------------|-----------------------------------------------|----------------|-------|----------------|
|   |                                     | <i>n</i> <sup>1</sup>                        | Mean<br>change | SD    | Effect<br>size | <i>n</i> <sup>1</sup>                         | Mean<br>change | SD    | Effect<br>size |
| 1 | Pain on load                        | 512                                          | -14,60         | 26,32 | -0,55          | 419                                           | -29,38         | 25,09 | -1,17          |
| 2 | Pain on motion without load         | 517                                          | -15,67         | 26,82 | -0,58          | 423                                           | -24,80         | 26,15 | -0,95          |
| 3 | Pain at rest                        | 515                                          | -14,24         | 27,58 | -0,52          | 419                                           | -20,63         | 27,51 | -0,75          |
| 4 | Stiffness                           | 512                                          | -4,11          | 26,33 | -0,16          | 418                                           | -11,80         | 25,92 | -0,46          |
| 5 | Weakness                            | 509                                          | -9,63          | 27,08 | -0,36          | 415                                           | -18,59         | 26,50 | -0,70          |
| 6 | Numbness/tingling in fingers        | 511                                          | -6,78          | 26,55 | -0,26          | 411                                           | -8,73          | 26,85 | -0,33          |
| 7 | Cold sensitivity                    | 463                                          | -10,60         | 30,57 | -0,35          | 387                                           | -8,64          | 29,43 | -0,29          |
| 8 | Ability to perform daily activities | 512                                          | -13,68         | 28,42 | -0,48          | 417                                           | -26,69         | 27,68 | -0,96          |

Supplementary Table S10.

Effect size calculations for the HQ-8 questionnaire in the subgroup Dupuytren´s contracture. Number of responses <sup>1</sup>. The mean paired change between pre- and 3 months follow-up as well as pre- and 12 months follow-up was divided by the dispersion measure (SD) of the preoperative (baseline) scores.

| Dupuytren´s contracture |                                     | Baseline-preoperative/<br>3- month follow up |                |       |                | Baseline-preoperative/<br>12- month follow up |                |       |                |
|-------------------------|-------------------------------------|----------------------------------------------|----------------|-------|----------------|-----------------------------------------------|----------------|-------|----------------|
|                         | HQ-8 questionnaire                  | <i>n</i> <sup>1</sup>                        | Mean<br>change | SD    | Effect<br>size | <i>n</i> <sup>1</sup>                         | Mean<br>change | SD    | Effect<br>size |
| 1                       | Pain on load                        | 810                                          | -3,93          | 23,68 | -0,17          | 695                                           | -6,43          | 23,11 | -0,28          |
| 2                       | Pain on motion without load         | 811                                          | -1,13          | 16,59 | -0,07          | 701                                           | -2,24          | 16,31 | -0,14          |
| 3                       | Pain at rest                        | 819                                          | -1,75          | 16,96 | -0,10          | 706                                           | -3,83          | 16,50 | -0,23          |
| 4                       | Stiffness                           | 812                                          | -13,85         | 30,58 | -0,45          | 700                                           | -19,06         | 31,49 | -0,61          |
| 5                       | Weakness                            | 809                                          | -6,71          | 26,64 | -0,25          | 694                                           | -9,03          | 26,98 | -0,33          |
| 6                       | Numbness/tingling in fingers        | 808                                          | -2,24          | 23,61 | -0,09          | 700                                           | -5,15          | 23,37 | -0,22          |
| 7                       | Cold sensitivity                    | 769                                          | -3,68          | 28,48 | -0,13          | 679                                           | -3,04          | 28,54 | -0,11          |
| 8                       | Ability to perform daily activities | 808                                          | -12,91         | 27,04 | -0,48          | 701                                           | -18,21         | 28,20 | -0,65          |

Supplementary Table S11.

Effect size calculations for the HQ-8 questionnaire in the subgroup de Quervain. Number of responses <sup>1</sup>.

The mean paired change between pre- and 3 months follow-up as well as pre- and 12 months follow-up was divided by the dispersion measure (SD) of the preoperative (baseline) scores.

| De Quervain |                                     | Baseline-preoperative/<br>3- month follow up |                |       |                | Baseline-preoperative/<br>12- month follow up |                |       |                |
|-------------|-------------------------------------|----------------------------------------------|----------------|-------|----------------|-----------------------------------------------|----------------|-------|----------------|
|             | HQ-8 questionnaire                  | <i>n</i> <sup>1</sup>                        | Mean<br>change | SD    | Effect<br>size | <i>n</i> <sup>1</sup>                         | Mean<br>change | SD    | Effect<br>size |
| 1           | Pain on load                        | 189                                          | -16,61         | 30,54 | -0,54          | 122                                           | -24,12         | 31,61 | -0,76          |
| 2           | Pain on motion without load         | 189                                          | -12,12         | 28,23 | -0,43          | 122                                           | -17,31         | 29,93 | -0,58          |
| 3           | Pain at rest                        | 188                                          | -9,72          | 26,80 | -0,36          | 122                                           | -10,78         | 28,02 | -0,38          |
| 4           | Stiffness                           | 186                                          | -6,64          | 26,60 | -0,25          | 122                                           | -11,80         | 29,42 | -0,40          |
| 5           | Weakness                            | 188                                          | -8,86          | 27,03 | -0,33          | 121                                           | -14,04         | 29,30 | -0,48          |
| 6           | Numbness/tingling in fingers        | 184                                          | -1,01          | 26,61 | -0,04          | 117                                           | -3,70          | 29,34 | -0,13          |
| 7           | Cold sensitivity                    | 177                                          | -2,69          | 28,11 | -0,10          | 119                                           | -2,56          | 29,52 | -0,09          |
| 8           | Ability to perform daily activities | 188                                          | -15,77         | 31,38 | -0,50          | 122                                           | -21,39         | 32,30 | -0,66          |

## Supplementary Table S12.

Effect size calculations for the HQ-8 questionnaire in the subgroup ganglion. Number of responses <sup>1</sup>.

The mean paired change between pre- and 3 months follow-up as well as pre- and 12 months follow-up was divided by the dispersion measure (SD) of the preoperative (baseline) scores.

|   | Ganglion                            | Baseline-preoperative/<br>3- month follow up |                |       |                | Baseline-preoperative/<br>12- month follow up |                |       |                |
|---|-------------------------------------|----------------------------------------------|----------------|-------|----------------|-----------------------------------------------|----------------|-------|----------------|
|   |                                     | <i>n</i> <sup>1</sup>                        | Mean<br>change | SD    | Effect<br>size | <i>n</i> <sup>1</sup>                         | Mean<br>change | SD    | Effect<br>size |
| 1 | Pain on load                        | 440                                          | -8,07          | 28,17 | -0,29          | 310                                           | -14,10         | 29,63 | -0,48          |
| 2 | Pain on motion without load         | 440                                          | -4,26          | 20,86 | -0,20          | 310                                           | -7,19          | 22,56 | -0,32          |
| 3 | Pain at rest                        | 436                                          | -4,08          | 18,99 | -0,21          | 306                                           | -4,61          | 20,11 | -0,23          |
| 4 | Stiffness                           | 437                                          | -1,08          | 23,21 | -0,05          | 309                                           | -3,00          | 23,16 | -0,13          |
| 5 | Weakness                            | 439                                          | -3,60          | 25,22 | -0,14          | 307                                           | -4,68          | 25,07 | -0,19          |
| 6 | Numbness/tingling in fingers        | 436                                          | -3,57          | 22,45 | -0,16          | 306                                           | -1,56          | 20,75 | -0,08          |
| 7 | Cold sensitivity                    | 409                                          | -4,06          | 24,58 | -0,17          | 301                                           | -2,27          | 23,75 | -0,10          |
| 8 | Ability to perform daily activities | 436                                          | -7,88          | 25,62 | -0,31          | 310                                           | -10,57         | 26,11 | -0,40          |

Supplementary Table S13.

Effect size calculations for the HQ-8 questionnaire in the subgroup trigger finger. Number of responses <sup>1</sup>.  
 The mean paired change between pre- and 3 months follow-up as well as pre- and 12 months follow-up was divided by the dispersion measure (SD) of the preoperative (baseline) scores.

|   | Trigger finger                      | Baseline-preoperative/<br>3- month follow up |                |       |                | Baseline-preoperative/<br>12- month follow up |                |       |                |
|---|-------------------------------------|----------------------------------------------|----------------|-------|----------------|-----------------------------------------------|----------------|-------|----------------|
|   |                                     | <i>n</i> <sup>1</sup>                        | Mean<br>change | SD    | Effect<br>size | <i>n</i> <sup>1</sup>                         | Mean<br>change | SD    | Effect<br>size |
| 1 | Pain on load                        | 888                                          | -12,76         | 30,06 | -0,42          | 637                                           | -22,79         | 30,15 | -0,76          |
| 2 | Pain on motion without load         | 898                                          | -9,25          | 26,34 | -0,35          | 637                                           | -17,54         | 26,77 | -0,66          |
| 3 | Pain at rest                        | 895                                          | -7,08          | 23,72 | -0,30          | 639                                           | -10,84         | 22,67 | -0,48          |
| 4 | Stiffness                           | 893                                          | -10,81         | 30,83 | -0,35          | 638                                           | -23,29         | 31,41 | -0,74          |
| 5 | Weakness                            | 891                                          | -9,06          | 28,86 | -0,31          | 638                                           | -18,33         | 29,72 | -0,62          |
| 6 | Numbness/tingling in fingers        | 887                                          | -2,84          | 23,61 | -0,12          | 637                                           | -4,57          | 23,62 | -0,19          |
| 7 | Cold sensitivity                    | 834                                          | -4,37          | 25,93 | -0,17          | 616                                           | -6,16          | 26,42 | 0,23           |
| 8 | Ability to perform daily activities | 895                                          | -13,24         | 29,73 | -0,45          | 640                                           | -22,39         | 29,62 | -0,76          |

Supplementary Table S14.

Effect size calculations for the HQ-8 questionnaire in the subgroup carpal tunnel syndrome. Number of responses <sup>1</sup>. The mean paired change between pre- and 3 months follow-up as well as pre- and 12 months follow-up was divided by the dispersion measure (SD) of the preoperative (baseline) scores.

|   | Carpal tunnel syndrome              | Baseline-preoperative/<br>3- month follow up |                |       |                | Baseline-preoperative/<br>12- month follow up |                |       |                |
|---|-------------------------------------|----------------------------------------------|----------------|-------|----------------|-----------------------------------------------|----------------|-------|----------------|
|   |                                     | <i>n</i> <sup>1</sup>                        | Mean<br>change | SD    | Effect<br>size | <i>n</i> <sup>1</sup>                         | Mean<br>change | SD    | Effect<br>size |
| 1 | Pain on load                        | 1715                                         | -7,69          | 29,54 | -0,26          | 1127                                          | -17,37         | 29,37 | -0,59          |
| 2 | Pain on motion without load         | 1727                                         | -9,12          | 26,53 | -0,34          | 1141                                          | -12,44         | 26,14 | -0,48          |
| 3 | Pain at rest                        | 1729                                         | -12,93         | 29,03 | -0,45          | 1143                                          | -15,24         | 28,96 | -0,53          |
| 4 | Stiffness                           | 1726                                         | -6,84          | 27,76 | -0,25          | 1138                                          | -12,30         | 27,61 | -0,45          |
| 5 | Weakness                            | 1718                                         | -6,80          | 28,82 | -0,24          | 1127                                          | -14,74         | 28,77 | -0,51          |
| 6 | Numbness/tingling in fingers        | 1733                                         | -24,07         | 36,61 | -0,66          | 1137                                          | -28,55         | 35,97 | -0,79          |
| 7 | Cold sensitivity                    | 1576                                         | -10,98         | 33,52 | -0,33          | 1066                                          | -12,46         | 33,30 | -0,37          |
| 8 | Ability to perform daily activities | 1731                                         | -11,39         | 29,43 | -0,39          | 1136                                          | -18,47         | 29,40 | -0,63          |

Supplementary Table S15.

Effect size calculations for the HQ-8 questionnaire in the subgroup ulnar nerve entrapment. Number of responses <sup>1</sup>. The mean paired change between pre- and 3 months follow-up as well as pre- and 12 months follow-up was divided by the dispersion measure (SD) of the preoperative (baseline) scores.

| Ulnar nerve entrapment |                                     | Baseline-preoperative/<br>3- month follow up |                |       |                | Baseline-preoperative/<br>12- month follow up |                |       |                |
|------------------------|-------------------------------------|----------------------------------------------|----------------|-------|----------------|-----------------------------------------------|----------------|-------|----------------|
|                        | HQ-8 questionnaire                  | <i>n</i> <sup>1</sup>                        | Mean<br>change | SD    | Effect<br>size | <i>n</i> <sup>1</sup>                         | Mean<br>change | SD    | Effect<br>size |
| 1                      | Pain on load                        | 264                                          | -6,81          | 31,63 | -0,22          | 181                                           | -5,12          | 29,49 | -0,17          |
| 2                      | Pain on motion without load         | 264                                          | -5,08          | 27,84 | -0,18          | 180                                           | -5,99          | 28,16 | -0,21          |
| 3                      | Pain at rest                        | 265                                          | -5,52          | 28,92 | -0,19          | 180                                           | -4,49          | 29,77 | -0,15          |
| 4                      | Stiffness                           | 261                                          | -3,15          | 28,12 | -0,11          | 181                                           | -2,84          | 29,99 | -0,09          |
| 5                      | Weakness                            | 266                                          | -6,58          | 31,40 | -0,21          | 184                                           | -6,09          | 31,77 | -0,19          |
| 6                      | Numbness/tingling in fingers        | 268                                          | -11,42         | 33,18 | -0,34          | 185                                           | -8,83          | 32,67 | -0,27          |
| 7                      | Cold sensitivity                    | 254                                          | -6,85          | 34,27 | -0,20          | 176                                           | -6,69          | 34,04 | -0,20          |
| 8                      | Ability to perform daily activities | 268                                          | -7,00          | 32,62 | -0,21          | 185                                           | -7,01          | 32,49 | -0,22          |

## Supplementary Table S16

Effect size calculations for the HQ-8 questionnaire in the subgroup digital nerve injuries. Number of responses <sup>1</sup>. The mean paired change between 3 and 12 months follow-up was divided by the dispersion measure (SD) of the 3-months scores.

|   | Digital nerve injuries              | 3 month follow up/<br>12 month follow-up |             |       |             |
|---|-------------------------------------|------------------------------------------|-------------|-------|-------------|
|   | HQ-8 questionnaire                  | <i>n</i> <sup>1</sup>                    | Mean change | SD    | Effect size |
| 1 | Pain on load                        | 202                                      | -2,05       | 24,41 | -0,08       |
| 2 | Pain on motion without load         | 202                                      | -1,29       | 19,64 | -0,07       |
| 3 | Pain at rest                        | 201                                      | 0,48        | 16,58 | 0,03        |
| 4 | Stiffness                           | 202                                      | -3,12       | 25,22 | -0,12       |
| 5 | Weakness                            | 201                                      | -2,10       | 25,91 | -0,08       |
| 6 | Numbness/tingling in fingers        | 202                                      | 1,17        | 28,88 | 0,04        |
| 7 | Cold sensitivity                    | 184                                      | 3,45        | 32,09 | 0,11        |
| 8 | Ability to perform daily activities | 202                                      | -0,40       | 22,61 | -0,02       |



### Supplementary Table S17.

Effect size calculations for the HQ-8 questionnaire in the subgroup extensor tendon lacerations. Number of responses <sup>1</sup>. The mean paired change between 3 and 12 months follow-up was divided by the dispersion measure (SD) of the 3-months scores.

|   | Extensor tendon lacerations         | 3 month follow up/<br>12 month follow-up |             |       |             |
|---|-------------------------------------|------------------------------------------|-------------|-------|-------------|
|   | HQ-8 questionnaire                  | <i>n</i> <sup>1</sup>                    | Mean change | SD    | Effect size |
| 1 | Pain on load                        | 115                                      | -5,31       | 25,57 | -0,21       |
| 2 | Pain on motion without load         | 117                                      | -2,11       | 19,36 | -0,11       |
| 3 | Pain at rest                        | 118                                      | 0,39        | 12,39 | 0,03        |
| 4 | Stiffness                           | 115                                      | -5,08       | 25,21 | -0,20       |
| 5 | Weakness                            | 117                                      | -8,11       | 26,46 | -0,31       |
| 6 | Numbness/tingling in fingers        | 116                                      | -1,22       | 22,41 | -0,05       |
| 7 | Cold sensitivity                    | 106                                      | 3,23        | 27,91 | 0,12        |
| 8 | Ability to perform daily activities | 118                                      | -1,47       | 21,18 | -0,07       |

### Supplementary Table S18.

Effect size calculations for the HQ-8 questionnaire in the subgroup flexor tendon lacerations. Number of responses <sup>1</sup>. The mean paired change between 3 and 12 months follow-up was divided by the dispersion measure (SD) of the 3-months scores.

|   | Flexor tendon lacerations           | 3 month follow up/<br>12 month follow-up |             |       |             |
|---|-------------------------------------|------------------------------------------|-------------|-------|-------------|
|   | HQ-8 questionnaire                  | <i>n</i> <sup>1</sup>                    | Mean change | SD    | Effect size |
| 1 | Pain on load                        | 202                                      | -2,78       | 26,99 | -0,10       |
| 2 | Pain on motion without load         | 204                                      | -2,91       | 21,00 | -0,14       |
| 3 | Pain at rest                        | 202                                      | 0,97        | 18,76 | 0,05        |
| 4 | Stiffness                           | 204                                      | -3,88       | 25,48 | -0,15       |
| 5 | Weakness                            | 205                                      | -6,46       | 26,06 | -0,25       |
| 6 | Numbness/tingling in fingers        | 202                                      | 3,44        | 30,14 | 0,11        |
| 7 | Cold sensitivity                    | 195                                      | 4,86        | 34,60 | 0,14        |
| 8 | Ability to perform daily activities | 202                                      | -5,05       | 25,39 | -0,20       |

### Supplementary Table S19.

Effect size calculations for the HQ-8 questionnaire in the subgroup thumb ligament injury. Number of responses <sup>1</sup>. The mean paired change between 3 and 12 months follow-up was divided by the dispersion measure (SD) of the 3-months scores.

|   | Thumb ligament injury               | 3 month follow up/<br>12 month follow-up |             |       |             |
|---|-------------------------------------|------------------------------------------|-------------|-------|-------------|
|   | HQ-8 questionnaire                  | <i>n</i> <sup>1</sup>                    | Mean change | SD    | Effect size |
| 1 | Pain on load                        | 106                                      | -1,96       | 22,29 | -0,09       |
| 2 | Pain on motion without load         | 108                                      | -3,14       | 20,55 | -0,15       |
| 3 | Pain at rest                        | 107                                      | -0,64       | 16,08 | -0,04       |
| 4 | Stiffness                           | 108                                      | -7,67       | 27,63 | -0,28       |
| 5 | Weakness                            | 106                                      | -4,36       | 26,38 | -0,17       |
| 6 | Numbness/tingling in fingers        | 106                                      | 0,80        | 20,52 | 0,04        |
| 7 | Cold sensitivity                    | 95                                       | 3,92        | 26,47 | 0,15        |
| 8 | Ability to perform daily activities | 108                                      | -3,53       | 24,38 | -0,14       |

### Supplementary Table S 20.

Effect size calculations for the HQ-8 questionnaire in the subgroup finger fractures. Number of responses <sup>1</sup>. The mean paired change between 3 and 12 months follow-up was divided by the dispersion measure (SD) of the 3-months scores.

| Finger fractures |                                     | 3 month follow up/<br>12 month follow-up |             |       |             |
|------------------|-------------------------------------|------------------------------------------|-------------|-------|-------------|
|                  | HQ-8 questionnaire                  | <i>n</i> <sup>1</sup>                    | Mean change | SD    | Effect size |
| 1                | Pain on load                        | 402                                      | -6,66       | 25,58 | -0,26       |
| 2                | Pain on motion without load         | 402                                      | -3,03       | 19,92 | -0,15       |
| 3                | Pain at rest                        | 405                                      | -1,10       | 16,47 | -0,07       |
| 4                | Stiffness                           | 405                                      | -4,81       | 28,05 | -0,17       |
| 5                | Weakness                            | 402                                      | -6,29       | 27,23 | -0,23       |
| 6                | Numbness/tingling in fingers        | 404                                      | 0,26        | 25,21 | 0,01        |
| 7                | Cold sensitivity                    | 380                                      | 5,03        | 31,55 | 0,16        |
| 8                | Ability to perform daily activities | 402                                      | -5,22       | 26,53 | -0,20       |
